# Supplementary material
Source: bioRxiv or medRxiv preprint supplement (https://www.medrxiv.org/highwire/filestream/82417/field_highwire_adjunct_files/0/2020.05.17.20104554-1.pdf)

# The true case fatality of COVID-19: An analytical solution

Syamantak Khan

Department of Radiation Oncology, Stanford University. [drskhan@stanford.edu](mailto:drskhan@stanford.edu)

## I. Supplementary Tables:

TableS1: COVID-19 related data from countries with more than 50,000 testings till 14 April 2020

| Country      | Number of Testing | Number of detected cases | Number of Deaths | Number of Test/ Total Case | Observed Case fatality (%) | Country      | Number of Testing | Number of detected cases | Number of Deaths | Number of Test/ Total Case | Observed Case fatality (%) |
|--------------|-------------------|--------------------------|------------------|----------------------------|----------------------------|--------------|-------------------|--------------------------|------------------|----------------------------|----------------------------|
| USA          | 3058078           | 610206                   | 25830            | 5.01155                    | 4.233                      | Peru         | 102216            | 10303                    | 230              | 9.92099                    | 2.23236                    |
| Russia       | 1400000           | 21102                    | 170              | 66.34442                   | 0.80561                    | Belgium      | 102151            | 31119                    | 4157             | 3.28259                    | 13.3584                    |
| Germany      | 1317887           | 131359                   | 3294             | 10.03271                   | 2.50763                    | Thailand     | 100498            | 2613                     | 41               | 38.46077                   | 1.56908                    |
| Italy        | 1073689           | 162488                   | 21067            | 6.6078                     | 12.96527                   | Hong Kong    | 96709             | 1013                     | 4                | 95.46792                   | 0.39487                    |
| UAE          | 648195            | 4933                     | 28               | 131.3998                   | 0.56761                    | Ireland      | 90646             | 11479                    | 406              | 7.89668                    | 3.53689                    |
| Spain        | 600000            | 172541                   | 18056            | 3.47743                    | 10.46476                   | Chile        | 87794             | 7917                     | 92               | 11.0893                    | 1.16206                    |
| S. Korea     | 527438            | 10564                    | 222              | 49.92787                   | 2.10148                    | South Africa | 87022             | 2415                     | 27               | 36.03395                   | 1.11801                    |
| Turkey       | 443626            | 65111                    | 1403             | 6.81338                    | 2.15478                    | Malaysia     | 84791             | 4987                     | 82               | 17.00241                   | 1.64428                    |
| Canada       | 437475            | 26897                    | 898              | 16.26483                   | 3.33866                    | Japan        | 78702             | 7645                     | 143              | 10.29457                   | 1.8705                     |
| UK           | 382650            | 93873                    | 12107            | 4.07625                    | 12.89721                   | Kazakhstan   | 76904             | 1232                     | 14               | 62.42208                   | 1.13636                    |
| Australia    | 366493            | 6400                     | 61               | 57.26453                   | 0.95313                    | Denmark      | 74210             | 6511                     | 299              | 11.39763                   | 4.59223                    |
| France       | 333807            | 143303                   | 15729            | 2.32938                    | 10.97604                   | Singapore    | 72680             | 3252                     | 10               | 22.34932                   | 0.3075                     |
| Iran         | 287359            | 74877                    | 4683             | 3.83775                    | 6.25426                    | Belarus      | 71875             | 3281                     | 33               | 21.90643                   | 1.00579                    |
| India        | 244893            | 11487                    | 393              | 21.31914                   | 3.42126                    | Azerbaijan   | 71736             | 1197                     | 13               | 59.92982                   | 1.08605                    |
| Switzerland  | 199000            | 25936                    | 1174             | 7.67273                    | 4.52653                    | Romania      | 70097             | 6879                     | 351              | 10.19                      | 5.10249                    |
| Portugal     | 182707            | 17448                    | 567              | 10.47152                   | 3.24966                    | Uzbekistan   | 70000             | 1165                     | 4                | 60.08584                   | 0.34335                    |
| Austria      | 151796            | 14226                    | 384              | 10.67032                   | 2.69928                    | Pakistan     | 69928             | 5837                     | 96               | 11.98013                   | 1.64468                    |
| Saudi Arabia | 150000            | 5369                     | 73               | 27.93816                   | 1.35966                    | Bahrain      | 69359             | 1528                     | 7                | 45.39202                   | 0.45812                    |
| Poland       | 148321            | 7202                     | 263              | 20.59442                   | 3.65176                    | New Zealand  | 64399             | 1366                     | 9                | 47.14422                   | 0.65886                    |
| Netherlands  | 134972            | 27419                    | 2945             | 4.92257                    | 10.74073                   | Brazil       | 62985             | 24920                    | 1489             | 2.52749                    | 5.97512                    |
| Israel       | 117339            | 12046                    | 123              | 9.74091                    | 1.02109                    | Sweden       | 54700             | 11445                    | 1033             | 4.77938                    | 9.02578                    |
| Czechia      | 131542            | 6111                     | 161              | 21.52545                   | 2.63459                    | Qatar        | 52622             | 3428                     | 7                | 15.35064                   | 0.2042                     |
| Norway       | 128569            | 6623                     | 139              | 19.4125                    | 2.09875                    |              |                   |                          |                  |                            |                            |
| Vietnam      | 121821            | 266                      |                  | 457.9737                   | 0                          |              |                   |                          |                  |                            |                            |

<sup>a</sup> The data was obtained from worldometers.info, which uses official reports, government's communication channels, and local media when deemed reliable as the sources of COVID-19 related data.

II. Supplementary Figures:

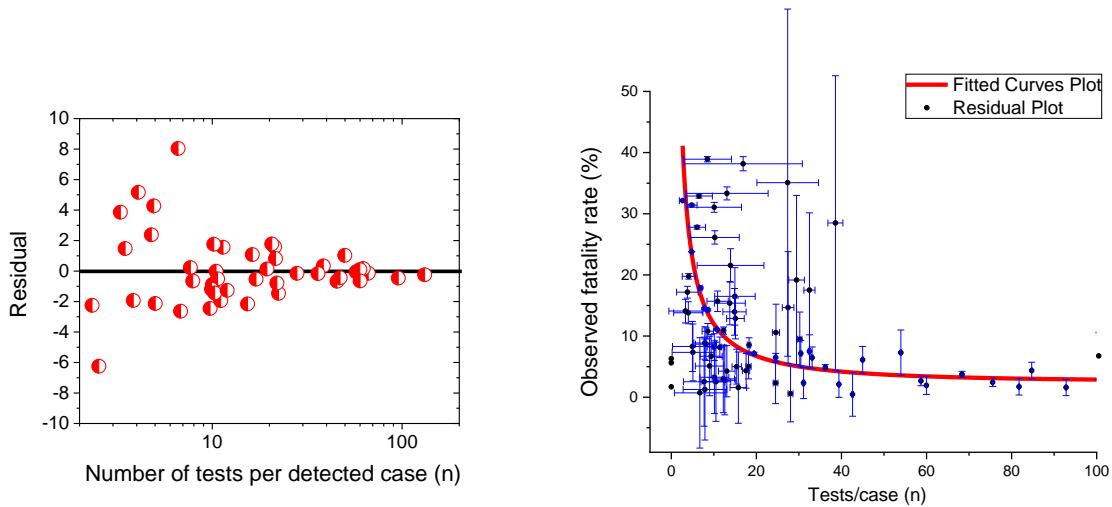

Figure S1: Residual plot for fitting the dataset with equation 7. The residual R squared value of the fitting was found to be 0.95 and can be improved by excluding a few outliers.

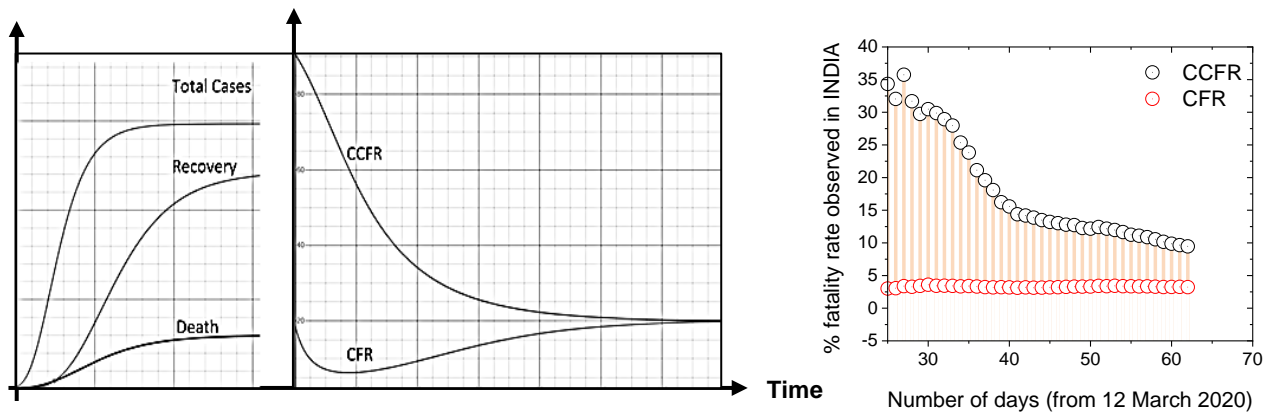

Figure S2: The dynamics of the fatality rates during a pandemic. LEFT: A simulated curve of CCFR and CFR using a modified SIR model (not discussed here) RIGHT: CCFR and CFR of INDIA calculated till 15 May 2020 (Data source: [www.covid19india.org](http://www.covid19india.org))

III. Supplementary Notes:

**Q1: Why is contact-tracing used in this modeling?**

The probability of the spread of infection from one particular individual gradually decreases from the close-contacts (persons who are close, or came close to the infected individual) to the far-contacts (persons who were physically distant from the infected individual). The probability of the spread of the infection approaches to zero for someone who is located at a large distance from the infected individual. To overcome this challenge, the detection strategies (COVID-19 testing) follow an efficient algorithm.

Most of the COVID-19 testing is done by finding close contacts or contact-tracing. When someone is tested positive, her/his family and friends, who came close to that person in the last 10-14 days are tested. However, when more number of suspects are tested (*tests-per-case*), the detection efficiency increases. Then, if they find a secondary infection, her/his close contacts are tested again. It goes on like a chain reaction. The testing need keeps growing according to the epidemic growth and the *tests-per-case* ratio. There is also some random testing being done but, it is a small fraction of the total test. The randomly detected individual also starts new chains of contact-tracing initiating from them. This is why the most affected places are currently testing more than other places.

**Q2: How is tests-per-case related to the testing rate within the population?**

**Answer:** When the testing rate is increased within a population, more infections are detected. However, the % positive rate of testing progressively decreases with further expansion of testing. This means, it will increase quickly when there are many undetected cases, but it will gradually stop increasing when most of the infected people have been identified. The aim is to accurately model the rate of detected cases in the population as a function of (1) the testing rate and (2) the true infection rate of the population. The figure here illustrates this expected relationship for two differently affected countries (red and black lines). In this example, country #1 (black dot) has fewer detected cases (per 1 M) than county #2 (red dot), but higher infection rate in reality (due to different testing rate). The observed fatality rate would, therefore, be higher in country #1 than #2. It is interesting to note that the slope of the two points is independent of the population and represents the testing rate more accurately. This slope mathematically represents the %positive rate of testing or a reciprocal of the *tests-per-case* (Thanks to Dr. G Pratz for the hand-drawn schematic).

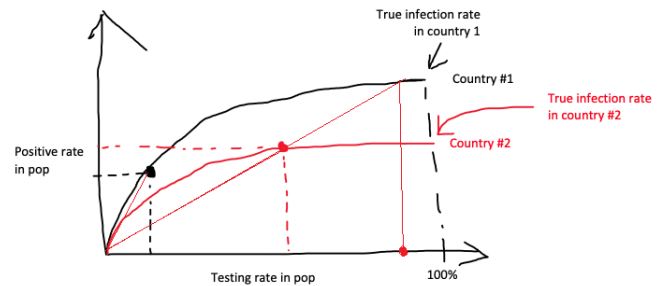

**Q3: Why is tests-per-million not used in this model instead of tests-per-case?**

**Answer:** Although counter-intuitive, the testing rate can be more than 100% in a population. The epidemic grows as a function of time and most of the infected people recover after a few days of infection, the testing is also performed dynamically according to the outbreak status. It is important to notice that, the unaffected population, once tested negative, can also contract the infection in the future. As a result, the same individual needs to be tested twice or thrice if they are suspects at different points of time. Moreover, the PCR testing is not confirmatory (has false negatives), some cases are missed. This means, testing everybody at a given point does not ensure 100% detection efficiency. In other words, the testing is aimed to accurately identify infection within the outbreak region, not in the whole population. A small number of random tests are often useful to detect new outbreaks, but most of the testing is performed where the probability of finding infection is maximum. As a result, the percent of the population tested has limited relevance to the actual detection efficiency of a country. In contrast, the average number of persons tested per confirmed case is free from that bias and represents a robust estimate for a testing rate within the outbreak region. A low value of *tests-per-case* indicates a high %positive rate (total case/total test) in testing, which is an indication of under-testing. This parameter is much more relevant and useful for mathematical modeling of COVID-19 outbreak, detection efficiency, or case fatality rate. For instance, the figure here shows that unlike the *tests-per-case*, *tests-per-million* is not well correlated with the observed case fatality rate.

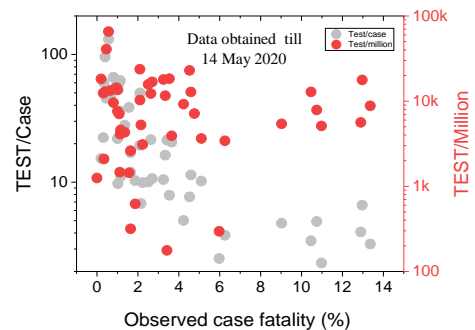

Supplement: Supplementary file [file 2020.05.17.20104554-1.pdf]
